# Supplementary material
Source: MDPI journal article supplement (https://www.mdpi.com/2071-1050/14/3/1793)
Supplement: s1 [file s1]

**Table S1.** Interview questions related to herbicide resistance management for growers (G), public or communal land managers (P), weed management advisors, agronomists, industry representatives, researchers and government staff (W).

| Question | Interview questions                                                                                                             | G (n=30) | P (n=39) | W (n=15) |
|----------|---------------------------------------------------------------------------------------------------------------------------------|----------|----------|----------|
|          | Can you tell me about your property? How large? How long have you lived here?                                                   | x        | -        | -        |
|          | What do you do/produce on the property?                                                                                         | x        | -        | -        |
|          | How long have you been working for ( <i>organisation</i> )?                                                                     | -        | x        | x        |
|          | What is your role in ( <i>organisation</i> )? What does an average day look like?                                               | -        | x        | x        |
|          | Where is weed management on your list of priorities?                                                                            | -        | -        | x        |
|          | On what types of land is ( <i>organisation</i> ) responsible for weed management?                                               | -        | x        | -        |
|          | Who carries out the majority of weed control work on this land? In-house or contractors?                                        | -        | x        | -        |
| Q1       | What do you see as the most significant issues surrounding the management of weeds in ( <i>region</i> )? Why?                   | x        | x        | x        |
| Q1a      | Do these issues affect your weed management practices? If so, how?                                                              | x        | x        | -        |
| Q1b      | Do these issues affect the weed management advice you provide? If so, how?                                                      | -        | -        | x        |
| Q2       | What are the three weeds of most concern to you? Why?                                                                           | x        | x        | -        |
| Q2       | What are the three weeds of most concern to ( <i>region/s</i> )?                                                                | -        | -        | x        |
| Q3       | Do you think it is necessary for people to work together to manage weeds?                                                       | x        | x        | x        |
| Q3a      | Do you talk to your neighbours about weeds?                                                                                     | x        | x        | -        |
| Q3b      | Do you (or your organisation) actively encourage people to work together to manage weeds? If so, how?                           | -        | -        | x        |
| Q3c      | Who do you think most needs to work together?                                                                                   | -        | -        | x        |
| Q3d      | What opportunities do you see for farmers and others to work together to manage weed issues?                                    | x        | x        | x        |
| Q3e      | Who do you get advice from? (agronomists, advisors etc.)                                                                        | x        | x        | -        |
| Q4       | What does “area-wide weed management” mean to you?                                                                              | x        | x        | x        |
| Q4a      | Can you describe any activities that you would consider to be “area-wide”?                                                      | x        | x        | x        |
| Q4b      | Were those activities successful?                                                                                               | x        | x        | x        |
| Q4c      | What do you believe made those activities un/successful?                                                                        | x        | x        | x        |
| Q4d      | Are there specific weeds that you believe are particularly well-suited to area-wide weed management?                            | x        | x        | x        |
| Q4e      | Have you been involved in any area-wide weed management activities? Why did you decide to participate?                          | x        | x        | x        |
| Q4f      | Is there anything you/your organisation can do to encourage area-wide weed management?                                          | -        | -        | x        |
| Q4g      | What do you think are the barriers to area-wide weed management? What might stop people from engaging in an area-wide approach? | x        | x        | x        |
| Q4h      | Do you think trust is an issue in weed management?                                                                              | x        | x        | x        |
| Q5       | Looking forward, how do you see the management of weeds developing in ( <i>region</i> )?                                        | x        | x        | x        |
| Q6       | Do you have any other comments you’d like to make?                                                                              | x        | x        | x        |
